# Supplementary material for: Treatment of immunoglobulin G4-related sialadenitis: outcomes of glucocorticoid therapy combined with steroid-sparing agents
Source: Springer Nature journal article supplement (doi:10.1186/s13075-017-1507-6), 2018-01-30
Supplement: MOESM1 [file 15426376]

## Scintigraphy assessments

Scintigraphy with  $^{99m}\text{Tc}$ -pertechnetate was performed according to a standardized protocol [1]. The “secretion phase” was defined as the period starting from stimulation with 2.5% citric acid solution until the minimum value reached within 30 min after stimulation. The secretion index (SI) was calculated using the following formula:

$$\text{SI} = \frac{(\text{maximum value before stimulation with citric acid} - \text{minimum value after stimulation with citric acid})}{(\text{maximum value before stimulation with citric acid} - \text{background})} \times 100\%$$

Both the parotid and submandibular glands were evaluated, and the mean value of the right and left sides was taken to be the SI of each type of salivary gland.

## References

1. Aung W, Yamada I, Umehara I, Ohbayashi N, Yoshino N, Shibuya H. Sjögren's syndrome: comparison of assessments with quantitative salivary gland scintigraphy and contrast sialography. *J Nucl Med.* 2000;41:257–62.
