# Supplementary material for: Treatment of immunoglobulin G4-related sialadenitis: outcomes of glucocorticoid therapy combined with steroid-sparing agents
Source: Springer Nature journal article supplement (doi:10.1186/s13075-017-1507-6), 2018-01-30
Supplement: MOESM2 [file 15426376]

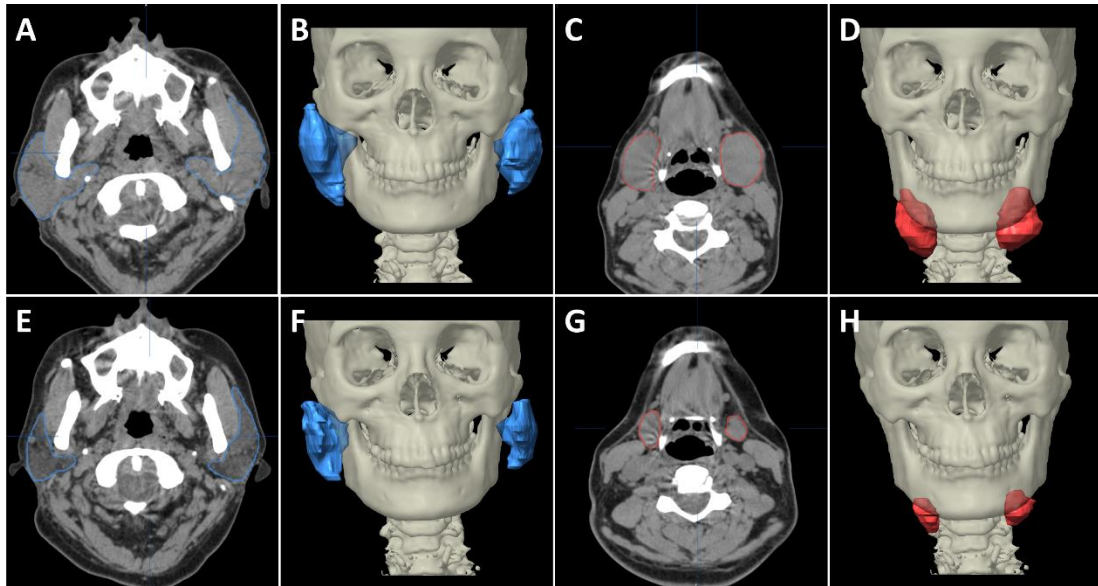

**Supple Fig. 1** Decrease of volumes and CT values of submandibular and parotid glands in IgG4-related sialadenitis patients.

The margins of parotid and submandibular glands are marked on axial CT scan and then reconstructed using volume rendering. The volumes and CT values of parotid glands (**A, B**) and submandibular glands (**C, D**) are higher than normal before treatment, and decrease obviously at 3 months (**E, F, G, H**). With the help of volume rendering, the alternations are quantifiable.
