# Supplementary material for: Treatment of immunoglobulin G4-related sialadenitis: outcomes of glucocorticoid therapy combined with steroid-sparing agents
Source: Springer Nature journal article supplement (doi:10.1186/s13075-017-1507-6), 2018-01-30
Supplement: MOESM3 [file 15426376]

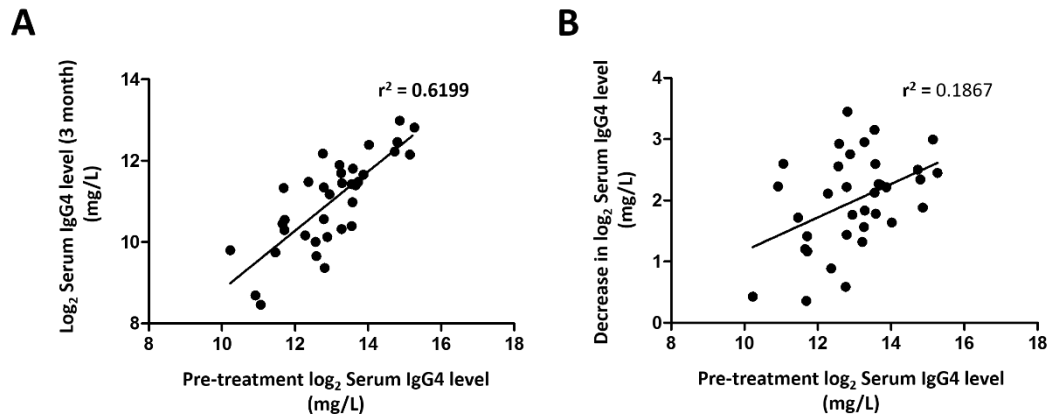

**Supple Fig. 2** Changes of serum IgG4 levels in short-term after treatment in IgG4-related sialadenitis patients.

Both the Log<sub>2</sub> serum IgG4 level at 3 months and the decrease value were positively correlated with pre-treatment Log<sub>2</sub> Serum IgG4 level (**A**,  $P < 0.0001$  and **B**,  $P = 0.0095$ , respectively), indicating that patients with higher baseline IgG4 levels showed a greater decrease after treatment, but were less likely to achieve lower or normal levels.
