# Supplementary material for: Treatment of immunoglobulin G4-related sialadenitis: outcomes of glucocorticoid therapy combined with steroid-sparing agents
Source: Springer Nature journal article supplement (doi:10.1186/s13075-017-1507-6), 2018-01-30
Supplement: MOESM4 [file 15426376]

**Supple Table 1** Differences in baseline features between clinically relapsing and clinically stable patients

|                                          | Clinically relapsing        | Clinically stable            | <i>P</i> |
|------------------------------------------|-----------------------------|------------------------------|----------|
|                                          | patients<br>( <i>n</i> = 6) | patients<br>( <i>n</i> = 22) |          |
| Number of involved SGs                   | 6.00 ± 0.00                 | 5.05 ± 1.49                  | 0.141    |
| Extra-salivary involvement, <i>n</i> (%) | 6 (100.0)                   | 21 (95.5)                    | 0.595    |
| Log <sub>2</sub> Serum IgG4 level (mg/L) | 13.04 ± 1.66                | 13.18 ± 1.05                 | 0.849    |
| Volume of SMG (cm <sup>3</sup> )         | 15.21 ± 4.97                | 11.46 ± 4.70                 | 0.236    |
| CT value of SMG (HU)                     | 36.01 ± 4.59                | 34.02 ± 6.65                 | 0.656    |
| Volume of PG (cm <sup>3</sup> )          | 39.76 ± 14.19               | 32.57 ± 7.42                 | 0.336    |
| CT value of PG (HU)                      | 4.74 ± 17.09                | -8.17 ± 16.74                | 0.112    |

**Supple Table 2** Differences in baseline features between serologically stable and serologically unstable patients

|                                          | Serologically<br>unstable patients<br>( <i>n</i> = 7) | Serologically<br>stable patients<br>( <i>n</i> = 15) | <i>P</i> |
|------------------------------------------|-------------------------------------------------------|------------------------------------------------------|----------|
| Number of involved SGs                   | 5.14 ± 1.57                                           | 5.00 ± 1.35                                          | 0.630    |
| Extra-salivary involvement, <i>n</i> (%) | 7 (100.0)                                             | 14 (93.3)                                            | 0.484    |
| Log <sub>2</sub> Serum IgG4 level (mg/L) | 13.29 ± 0.81                                          | 13.12 ± 1.12                                         | 0.680    |
| Volume of SMG (cm <sup>3</sup> )         | 10.44 ± 7.40                                          | 11.93 ± 2.97                                         | 0.837    |
| CT value of SMG (HU)                     | 39.08 ± 2.50                                          | 32.33 ± 6.79                                         | 0.053    |
| Volume of PG (cm <sup>3</sup> )          | 36.59 ± 6.53                                          | 30.69 ± 7.24                                         | 0.091    |
| CT value of PG (HU)                      | -5.67 ± 14.51                                         | -9.34 ± 18.04                                        | 0.680    |
